# Supplementary material for: A new link between transcriptional initiation and pre-mRNA splicing: The RNA binding histone variant H2A.B
Source: PubMed Central journal article supplement (PMC5345878; doi:10.1371/journal.pgen.1006633), 2017-02-24

# Supporting Figure 2

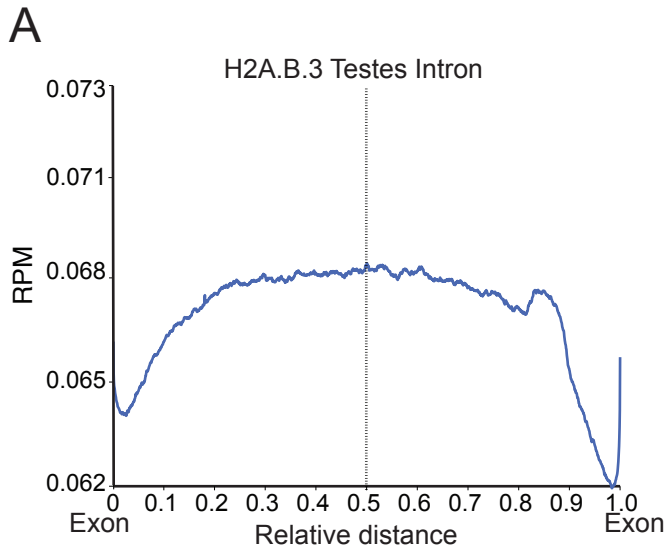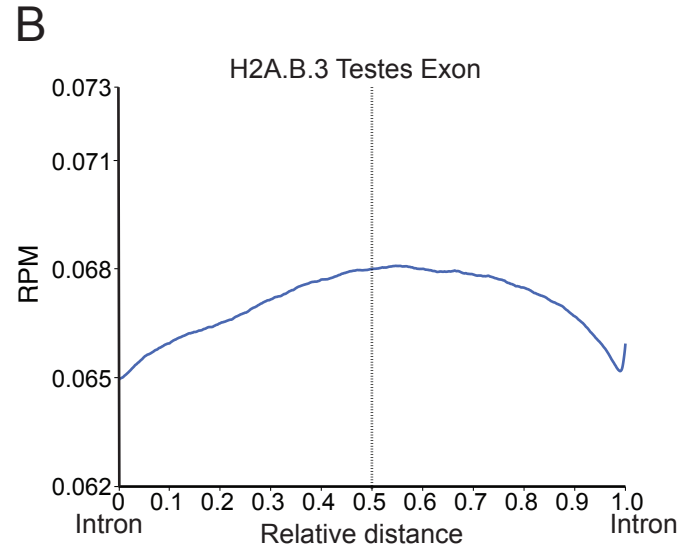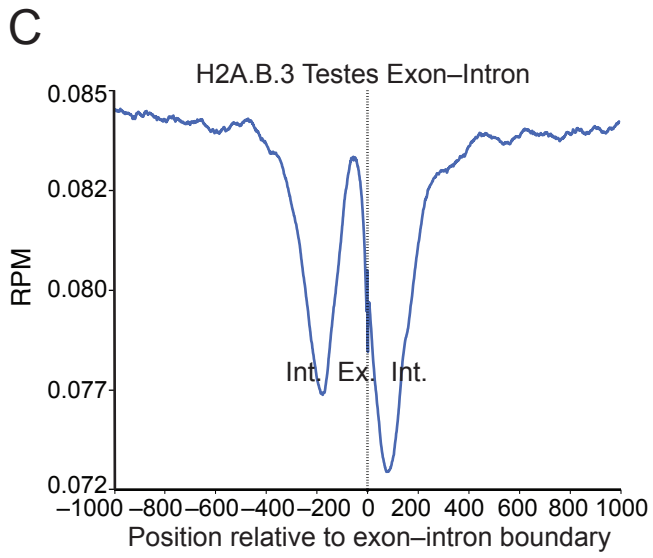

Supplement: pgen.1006633.s002.pdf [file pgen.1006633.s002.pdf]
