# Supplementary material for: A new link between transcriptional initiation and pre-mRNA splicing: The RNA binding histone variant H2A.B
Source: PubMed Central journal article supplement (PMC5345878; doi:10.1371/journal.pgen.1006633), 2017-02-24
Supplement: pgen.1006633.s012.pdf [file pgen.1006633.s012.pdf]

# Supporting Table 3

## Real-time PCR primer sequences for ChIP assays used in the study

### ChIP primers

|                 |                                                                             |
|-----------------|-----------------------------------------------------------------------------|
| Ctnnd2 (exon)   | Fw 5'-ACCCCCTCTGCCTTCTCTCT -3'<br>Rev 5'-GCCACTGCACACACTACACG -3'           |
| Ctnnd2 (intron) | Fw 5'-GCTCATGGATGCAGTCCCA -3'<br>Rev 5'-CGGACTGCCTAGCCCTGTTG -3'            |
| Mpped1 (exon)   | Fw 5'-GGTCTGACAGGTGCGTGCTT -3'<br>Rev 5'-GTCAGGAGTTCCGGGGTGTG -3'           |
| Mpped1 (intron) | Fw 5'-CAGTGTAGGGGTTGCCTGC -3'<br>Rev 5'-CACTCAGGATGCCCCAAGCC -3'            |
| Cntn1 (exon)    | Fw 5'-AGGTTTCGAGCACACAGCGAC -3'<br>Rev 5'-CGCTGATGTTGTGAACGCCG -3'          |
| Cntn1 (intron)  | Fw 5'-ACCTTGGTCCAGGCAAGCAC -3'<br>Rev 5'-CCCTCCAGGGTAGGCACTGT -3'           |
| Pkib (exon)     | Fw 5'-TGGTCCCGTTGATCCTTGGACT -3'<br>Rev 5'-AGGCCAGTCTCTCCCTAGCCA -3'        |
| Pkib (intron)   | Fw 5'-GTGTGAGCCGCTTCCTTCCC -3'<br>Rev 5'-GAGACAGCAAATGTGCCTCGGT -3'         |
| Tbata (exon)    | Fw 5'-ACACCCAGTGCCTACCGCTT -3'<br>Rev 5'-CCGCGGCCGTACCTTGGATA -3'           |
| Tbata (intron)  | Fw 5'-CTCCCCACCTCCTGGCAA -3'<br>Rev 5'-AGTCCTGCACGCTGGGATGT -3'             |
| Slain2 (exon)   | Fw 5'-AGTCCAAATGCCAGTAGCCCATAACA -3'<br>Rev 5'-AGCTGCTTGA CTATGGGAGGTCG -3' |
| Slain2 (intron) | Fw 5'-TGTGCTTGTGTGCACCACTTTGA -3'<br>Rev 5'-AGAGAAAACAAGCCACCAGCAAACA -3'   |
| Akap4 (site 1)  | Fw 5'-TCAGAGCCAGCAGGAAACAG -3'<br>Rev 5'-CCCTTTAGATGGAAGGGGGC -3'           |
| Akap4 (site 2)  | Fw 5'-GAGGCGTGTGCAAGGTAGAT -3'<br>Rev 5'-TGGAGAAGCCACATACCAGC -3'           |
| Akap4 (site 3)  | Fw 5'-GCAATCAGAGGTCAGTTGCCA -3'<br>Rev 5'-TTACGGGCCATTTGGATTACCA -3'        |
| Il2rg (site 1)  | Fw 5'-CCATGGTGCCAACAGGGATA -3'<br>Rev 5'-GTGCCTGGCATCCATGTCTT -3'           |
| Il2rg (site 2)  | Fw 5'-TACCGTTTTAGCTCATCCACA -3'<br>Rev 5'-AACGATCTATCCCTCACCTTCT -3'        |
| Il2rg (site 3)  | Fw 5'-CCCTTTCCCATAGCCTTCC -3'<br>Rev 5'-GTCCTCATGTCCAGTGCGAA -3'            |
| Akap14 (site 1) | Fw 5'-TATGCTTGGTCTCAGTAATGTCC -3'<br>Rev 5'-CCTTCCTCTACAGACCAGGAGAA -3'     |
| Akap14 (site 2) | Fw 5'-AGATGTAAGAGACATCAACAGGCA -3'<br>Rev 5'-TGGGAGGATTAAGCATCGGC -3'       |
| Akap14 (site 3) | Fw 5'-AAGAGCTTACGGCAGGTTTG -3'<br>Rev 5'-ACTATATCTACCGGGTGCCT -3'           |
