# Supplementary material for: A new link between transcriptional initiation and pre-mRNA splicing: The RNA binding histone variant H2A.B
Source: PubMed Central journal article supplement (PMC5345878; doi:10.1371/journal.pgen.1006633), 2017-02-24
Supplement: pgen.1006633.s013.pdf [file pgen.1006633.s013.pdf]

## Supporting Table 4

### List of Illumina libraries used in this study.

| Library name                   | mapped reads |
|--------------------------------|--------------|
| Input Testes rep. 1 SE         | 17,176,324   |
| Input Testes rep. 2 PE         | 195,910,428  |
| Input Hippocampus rep.1 SE     | 24,659,750   |
| Input Hippocampus rep. 2 PE    | 211,063,819  |
| H2A.B.3 Testes rep. 1 SE       | 32,031,375   |
| H2A.B.3 Testes tech. rep. 2 SE | 272,041,885  |
| H2A.B.3 Testes rep. 2 PE       | 209,303,490  |
| H2A.B.3 Hippocampus rep. 1 SE  | 22,155,937   |
| H2A.B.3 Hippocampus rep. 2 PE  | 186,891,694  |
| H2A.Z Testes rep.1 SE          | 21,089,223   |
| H2A.Z Testes tech. rep.2 SE    | 230,377,188  |
| H2A.Z Testes rep.2 PE          | 186,242,182  |
| H2A.Z Hippocampus rep. 1 SE    | 23,660,845   |
| H2A.Z Hippocampus rep. 2 PE    | 202,335,704  |
| H3K36me3 Testes rep. 1 PE      | 97,347,851   |
| H3K36me3 Testes rep. 2 PE      | 95,028,143   |
| H3K36me3 Hippocampus rep. 1 PE | 115,576,309  |
| H3K36me3 Hippocampus rep. 2 PE | 82,283,392   |
| H2A.B.3 RNA-IP 1 PE            | 11,406,861   |
| H2A.B.3 RNA-IP 2 PE            | 22,866,609   |
| H2A.B.3 RNA-IP 3 PE            | 16,496,632   |
| H2A.Z RNA-IP 1 PE              | 25,818,308   |
| H2A.Z RNA-IP 2 PE              | 15,572,918   |
| H2A.Z RNA-IP 3 PE              | 26,365,755   |
| Hippocampus RNA-Seq rep.1 PE   | 44,257,598   |
| Hippocampus RNA-Seq rep.2 PE   | 49,592,421   |
| Hippocampus RNA-Seq rep.3 PE   | 42,205,383   |
| Testes RNA-Seq rep1. PE        | 50,206,148   |
| Testes RNA-Seq rep2. PE        | 48,749,538   |
| Testes RNA-Seq rep3. PE        | 51,093,859   |

SE-Single End Reads, PE-Paired End Reads
